# Supplementary material for: Multi-omics analysis defines core genomic alterations in pheochromocytomas and paragangliomas
Source: PubMed Central journal article supplement (PMC4354166; doi:10.1038/ncomms7044), 2015-01-27
Supplement: ncomms7044-s1.pdf [file ncomms7044-s1.pdf]

# Supplementary Figures

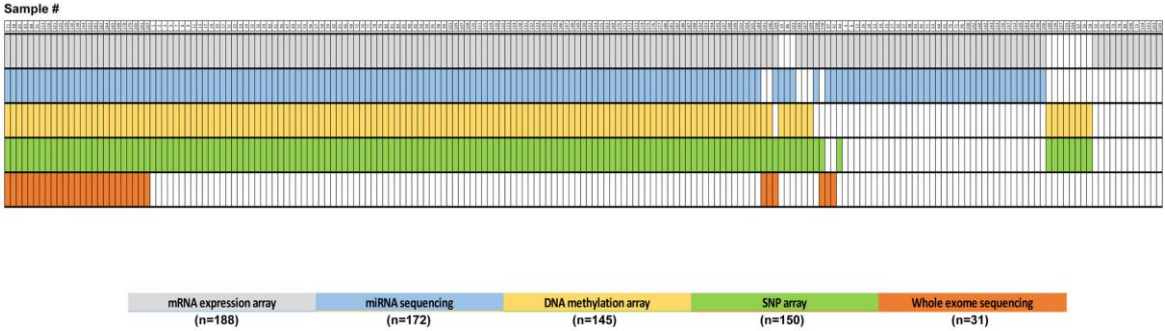

**Supplementary Figure 1. Characterization of tumors using genomic platforms.** The color code indicates the type of genomic analysis performed per sample.

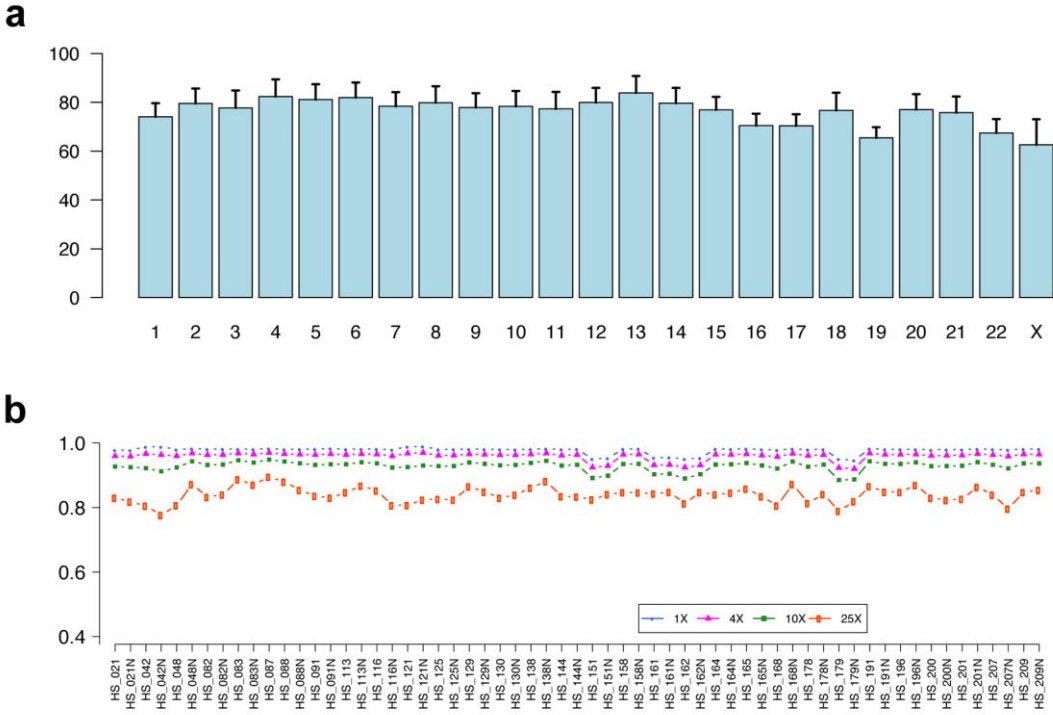

**Supplementary Figure 2. Coverage of whole exome sequencing data. (a)** Mean sequencing depth for each chromosome across the cohort. **(b)** Coverage at 1X, 4X, 10X and 25X for each sample.

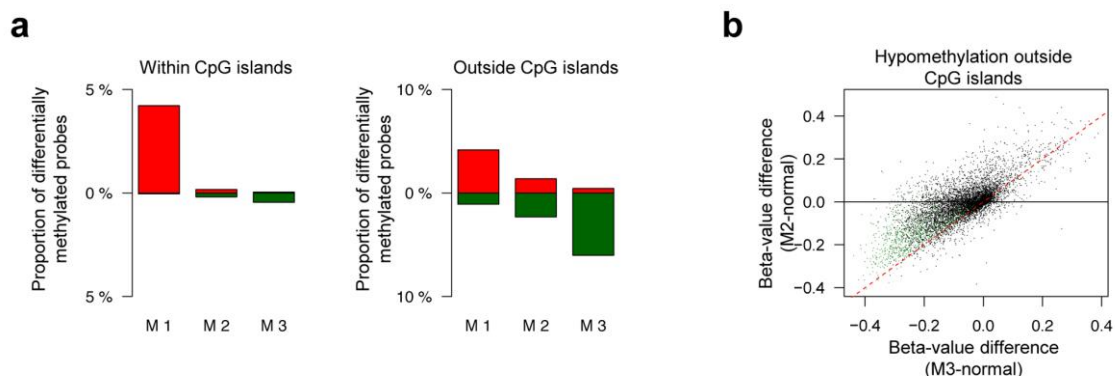

**Supplementary Figure 3. DNA methylation changes in each tumor subgroup. (a)**

Proportion of probes differentially methylated (hypermethylated: red; hypomethylated: green) between each cluster of tumors and normal controls ( $P < 0.01$ , Wilcoxon rank sum test). **(b)** Correlation between DNA hypomethylation outside CpG islands in M2 and M3 tumors. Probes significantly hypomethylated in M3 tumors are colored green.

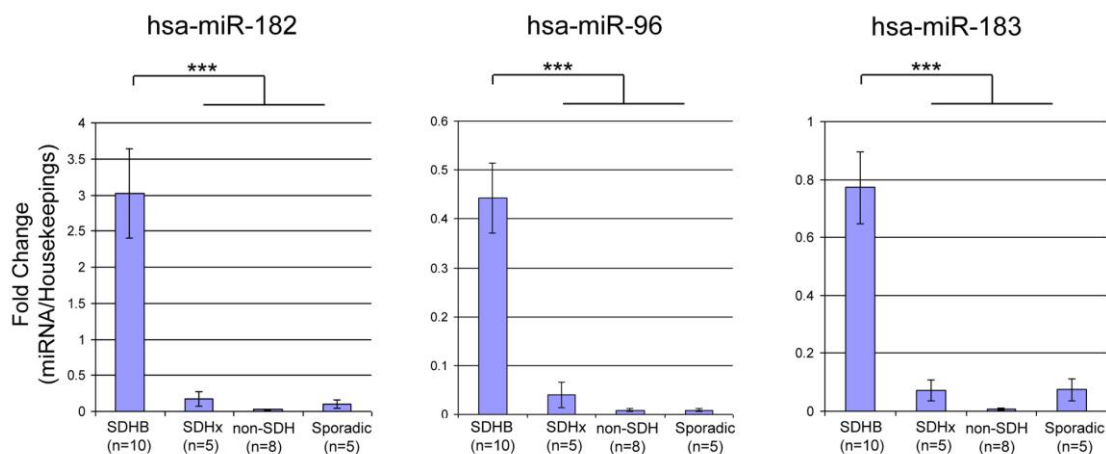

**Supplementary Figure 4. Validation of miRNA cluster 182/96/183 expression in**

**PCC/PGL.** The histograms show the mean expression for each miRNA in each tumor type, relative to the mean expression of miR-320 and miR-324 used as housekeeping (normalization controls). Detection was performed using RT-qPCR with specific Taqman assays. The highest expression is displayed by *SDHB*-mutated tumors (\*\*\*)  $p$ -value  $< 0.0001$ , two-tailed  $t$  test).

**a**

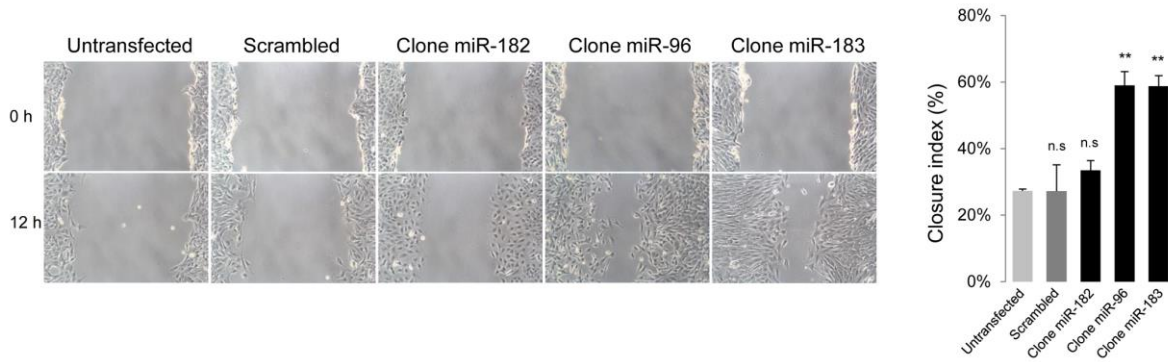

**b**

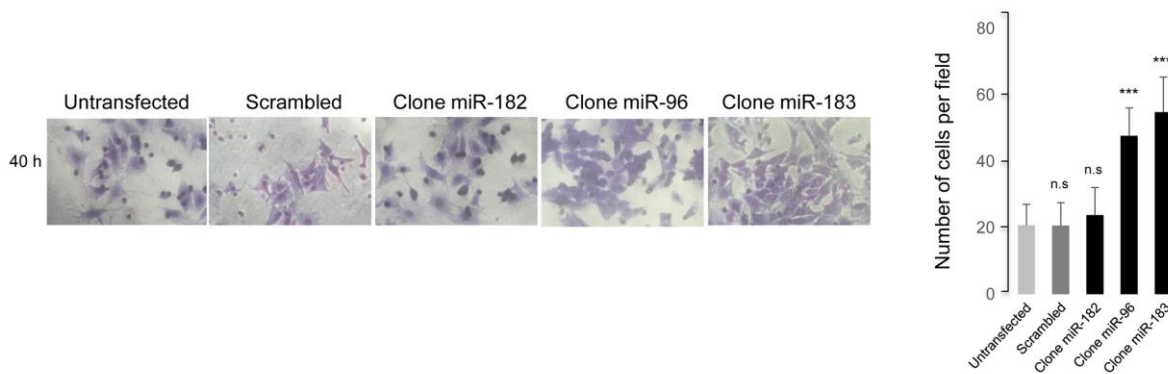

**Supplementary Figure 5. Overexpression of miR-96 or 183 enhances the migratory and invasive capacity of imCC cells. (a) Scratch assay.** Representative images (10X) of cells acquired at 0 h and 12 h. The histogram (on the right) shows the closure index (%) for each cell line quantified at 12 h. Error bars indicate standard deviation (n=10) (n.s: not significant; \*\*p-value <0.01, two-tailed t tests compared to untransfected cells) **(b) Invasion assay.** Representative images (32X) of invaded cells on filters were acquired at 40 h. Error bars indicate standard deviation (n=10) (n.s: not significant; \*\*p-value <0.001, two-tailed t tests compared to untransfected cells).

## Supplementary Table

| Aberration | Frequency in C1A tumors | Frequency in C1B tumors | Frequency in C2A tumors | Frequency in C2B tumors | Frequency in C2C tumors | q-value  |
|------------|-------------------------|-------------------------|-------------------------|-------------------------|-------------------------|----------|
| -1p        | 68.8                    | 9.1                     | 80.6                    | 27.3                    | 85.7                    | 1.13e-08 |
| +1q        | 50                      | 0                       | 19.4                    | 13.6                    | 0                       | 0.00386  |
| -3p        | 18.8                    | 86.4                    | 13.4                    | 4.5                     | 14.3                    | 5.37e-10 |
| -3q        | 25                      | 63.6                    | 64.2                    | 18.2                    | 85.7                    | 4.33e-04 |
| +7p        | 25                      | 4.5                     | 7.5                     | 36.4                    | 0                       | 0.00643  |
| +7q        | 12.5                    | 0                       | 4.5                     | 27.3                    | 0                       | 0.0114   |
| -11p       | 31.2                    | 72.7                    | 13.4                    | 27.3                    | 42.9                    | 3.56e-05 |
| LOH 14q32  | 6.2                     | 0                       | 4.5                     | 40.9                    | 42.9                    | 1.88e-05 |
| -17q11     | 6.2                     | 9.1                     | 35.8                    | 9.1                     | 14.3                    | 0.014    |

**Supplementary Table 1.** Copy number alterations associated with molecular clusters.
